# Supplementary material for: Assessing the assimilation of Himawari-8 observations on aerosol forecasts and radiative effects during pollution transport from South Asia to the Tibetan Plateau
Source: Copernicus journal article supplement (doi:10.5194/acp-24-235-2024), 2024-01-10
Supplement: Supplementary file 1 [file acp-24-235-2024-supplement.pdf]

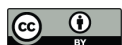

*Supplement of*

**Assessing the assimilation of Himawari-8 observations on aerosol forecasts and radiative effects during pollution transport from South Asia to the Tibetan Plateau**

**Min Zhao et al.**

*Correspondence to:* Tie Dai (daitie@mail.iap.ac.cn)

The copyright of individual parts of the supplement might differ from the article licence.

**Figure S1.** Comparison of emissions of BC, OC, and SO<sub>2</sub> (unit: g m<sup>-2</sup> month<sup>-1</sup>) in the MIX Asian and HTAPv3 emission inventories for March 2010. HTAPv3, Hemispheric Transport of Air Pollution version 3.

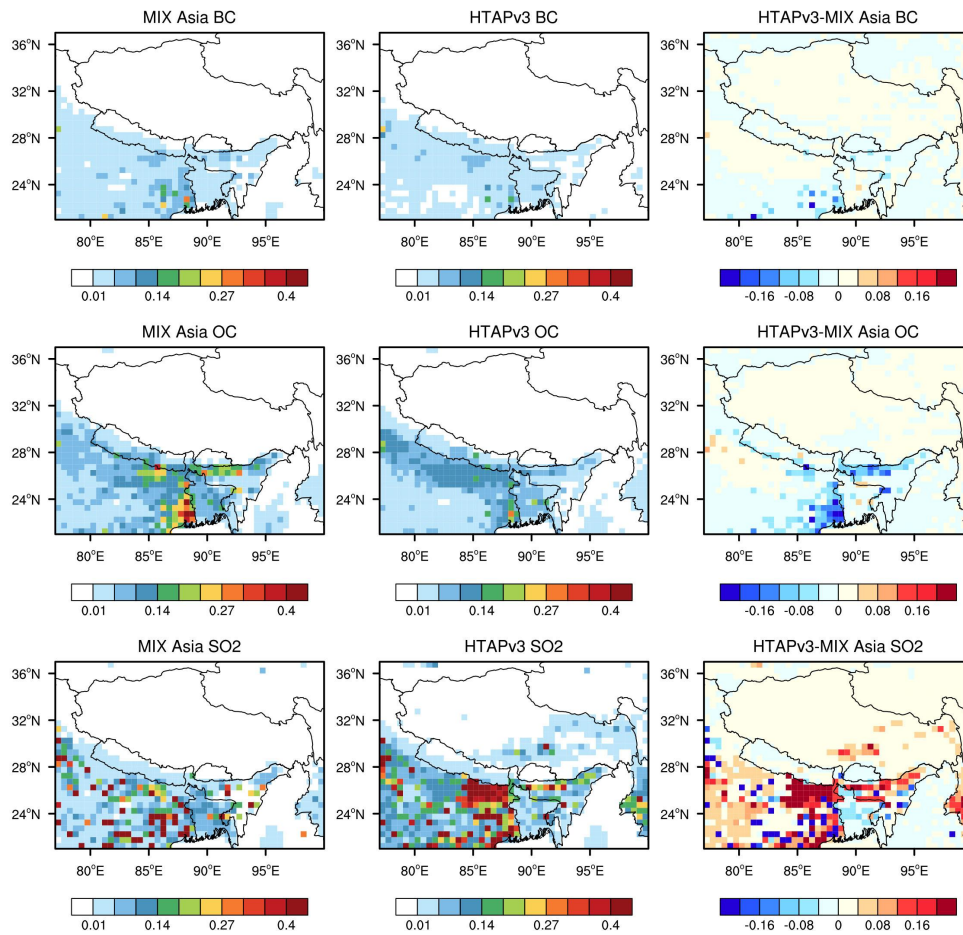

**Figure S2.** Comparison of emissions of BC, OC, and SO<sub>2</sub> (unit: g m<sup>-2</sup> month<sup>-1</sup>) in the HTAPv3 emission inventories for March 2010 and March 2018.

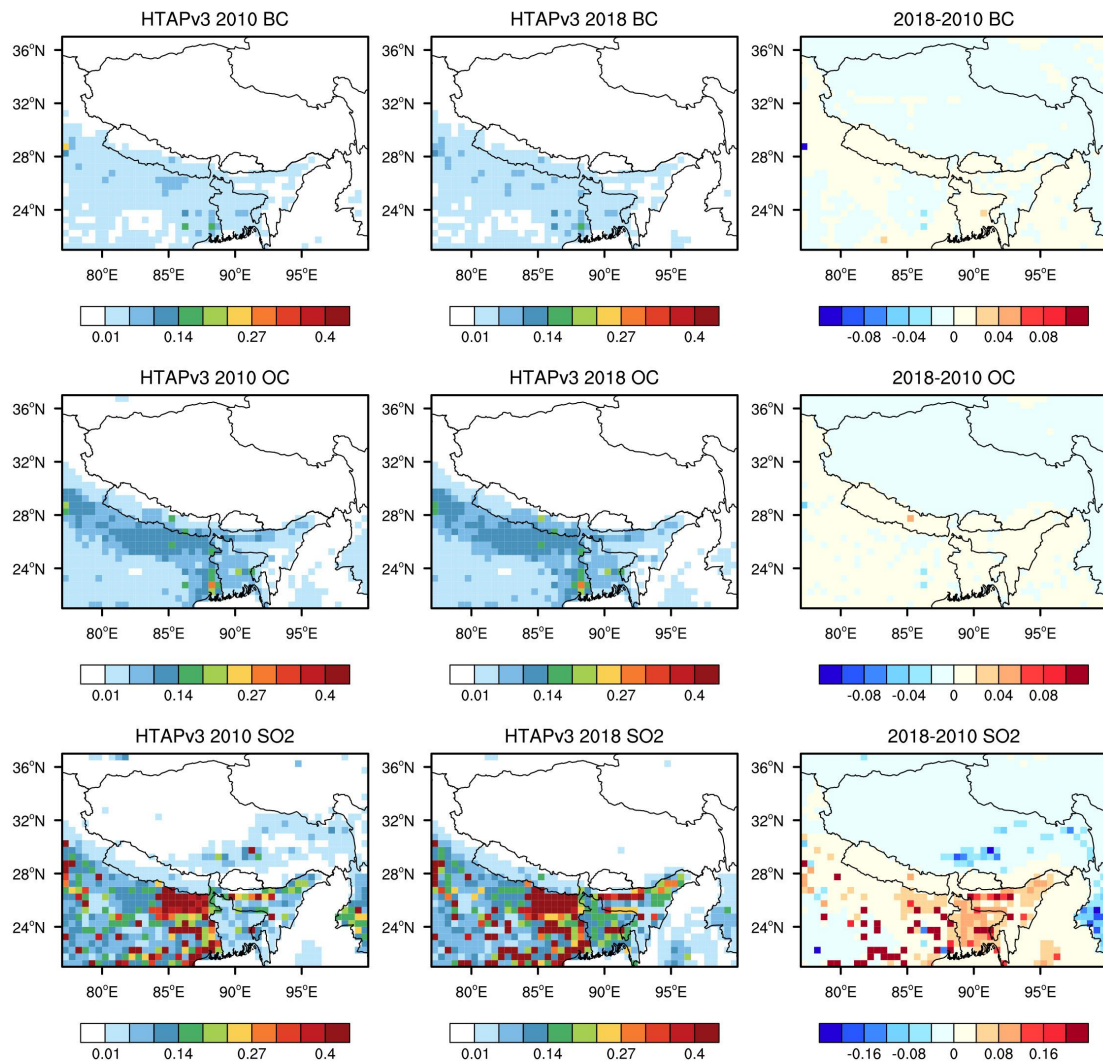

**Table S1: The summary of the abbreviations and their corresponding full names in this study.**

| <b>Abbreviation</b> | <b>Full name</b>                                                                                                   | <b>Abbreviation</b> | <b>Full name</b>                                      |
|---------------------|--------------------------------------------------------------------------------------------------------------------|---------------------|-------------------------------------------------------|
| SA                  | South Asia                                                                                                         | GOCART              | the Goddard Chemical Aerosol Radiation Transport      |
| TP                  | Tibetan Plateau                                                                                                    | NCEP                | the National Centers for Environmental Prediction     |
| DA                  | data assimilation                                                                                                  | AHI                 | Advanced Himawari Imager                              |
| AOT                 | aerosol optical thickness                                                                                          | AE                  | Ångström exponent                                     |
| WRF-Chem            | Weather Research and Forecasting-Chemistry                                                                         | JAXA                | the Japan Aerospace Exploration Agency                |
| MODIS               | Moderate Resolution Imaging Spectroradiometer                                                                      | DT                  | the Dark Target                                       |
| AERONET             | AERosol RObotic NETwork                                                                                            | DB                  | the Deep Blue                                         |
| BC                  | black carbon                                                                                                       | SYN                 | synoptic                                              |
| GOES-8              | Goddard Earth Observing System-8                                                                                   | BIAS                | mean bias                                             |
| GOCI                | Geostationary Ocean Color Imager                                                                                   | RMSE                | root-mean-square error                                |
| CERES               | Clouds and the Earth's Radiant Energy System                                                                       | CORR                | correlation coefficient                               |
| LETKF               | local ensemble transform Kalman filter                                                                             | PDFs                | the probability distribution functions                |
| MOSAIC              | Model for Simulating Aerosol Interactions and Chemistry                                                            | DSRc                | downward solar radiation under clear-sky              |
| RRTMG               | Rapid Radiative Transfer Model                                                                                     | DSR                 | downward radiation flux at the surface at the all-sky |
| OC                  | Organic Carbon                                                                                                     | PBLH                | planetary boundary layer height                       |
| PM <sub>2.5</sub>   | Particulate matter with an aerodynamic equivalent diameter of less than or equal to 2.5 micrometers in ambient air | T2                  | 2-m temperature                                       |
| PM <sub>10</sub>    | Particulate matter with an aerodynamic equivalent diameter of less than or equal to 10 micrometers in              | RH2                 | 2-m relative humidity                                 |

---

ambient air

---

|       |                                           |     |                          |
|-------|-------------------------------------------|-----|--------------------------|
| NMVOC | non-methane volatile organic<br>compounds | $q$ | water vapor mixing ratio |
|-------|-------------------------------------------|-----|--------------------------|

---

|      |                              |     |             |
|------|------------------------------|-----|-------------|
| FINN | the Fire INventory from NCAR | $T$ | temperature |
|------|------------------------------|-----|-------------|

---

|       |                                                                 |  |  |
|-------|-----------------------------------------------------------------|--|--|
| MEGAN | the Model of Emissions of<br>Gasses and Aerosols from<br>Nature |  |  |
|-------|-----------------------------------------------------------------|--|--|

---
